# Supplementary material for: The Gravitational Process Path (GPP) model (v1.0) – a GIS-based simulation framework for gravitational processes
Source: Copernicus journal article supplement (doi:10.5194/gmd-10-3309-2017), 2017-09-08
Supplement: Supplementary file 1 [file gmd-10-3309-2017-supplement.zip]

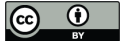

## *Supplement of*

# **The Gravitational Process Path (GPP) model (v1.0) – a GIS-based simulation framework for gravitational processes**

**Volker Wichmann**

*Correspondence to:* Volker Wichmann ([wichmann@alps-gmbh.com](mailto:wichmann@alps-gmbh.com))

- [gmd-10-3309-2017-supplement-title-page.pdf](#)
- data
  - RA\_ID\_10m.sdat
  - RA\_ID\_10m.sgrd
  - RA\_ID\_2\_5m.sdat
  - RA\_ID\_2\_5m.sgrd
  - RA\_ID\_5\_10m.sdat
  - RA\_ID\_5\_10m.sgrd
  - RA\_ID\_5\_single\_cell\_10m.sdat
  - RA\_ID\_5\_single\_cell\_10m.sgrd
  - RA\_ID\_5\_single\_cell\_Material\_10m.sdat
  - RA\_ID\_5\_single\_cell\_Material\_10m.sgrd
  - RA\_Material\_2\_5m.sdat
  - RA\_Material\_2\_5m.sgrd
  - dtm\_10m.sdat
  - dtm\_10m.sgrd
  - dtm\_10m\_no\_sinks.sdat
  - dtm\_10m\_no\_sinks.sgrd
  - dtm\_10m\_sink\_to\_fill.sdat
  - dtm\_10m\_sink\_to\_fill.sgrd
  - dtm\_2\_5m.sdat
  - dtm\_2\_5m.sgrd
  - orthophoto.sdat
  - orthophoto.sgrd

The copyright of individual parts of the supplement might differ from the CC BY 3.0 License.
